# Supplementary material
Source: Elsevier journal article supplement (https://www.sciencedirect.com/science/article/pii/S0034935616301426)
Supplement: mmc2 [file S0034935616301426:mmc2.doc]

**Tabla S2. DMD en periodos de 10 min en función de la DCD.**

|  | **Dosis de carga de dexmedetomidina** | | |  |
| --- | --- | --- | --- | --- |
| **Periodos de tiempo en minutos** | **<0,5 µg kg-1** | **0,5 µg kg-1** | **>0,5 µg kg-1** | ***p*** |
| **10– 20, mediana (rango)** | 0,8 (0,6 - 1,2) | 1 (0,5 - 1,3) | 1 (0,4 - 2,8) | 0,057 |
| **21 – 30, mediana (rango)** | 0,8 (0,4 - 1) | 1 (0,5 - 1,4) | 0,9 (0,3 - 1) | 0,072 |
| **31 – 40, mediana (rango)** | 0,8 (0,2 - 1) | 0,9 (0,3 - 1,4) | 0,8 (0,2 - 1,1) | 0,084 |
| **41 – 50, mediana (rango)** | 0,8 (0,2 - 1) | 0,8 (0 - 1,4) | 0,8 (0,1 - 1,2) | 0,313 |
| **51 – 60, mediana (rango)** | 0,7 (0,2 - 1) | 0,9 (0,1 - 1,3) | 0,8 (0 - 1,3) | 0,058 |

DMD: dosis de mantenimiento de dexmedetomidina; DCD: dosis de carga de dexmedetomidina.
